# Supplementary material
Source: PubMed Central journal article supplement (PMC3406684)
Supplement: supp_M112.372755_Mojzita_et_al_suppl.pdf [file supp_M112.372755_Mojzita_et_al_suppl.pdf]

# Supplementary material

Supplementary figure 1:

```
An-LxrA      1  MSR- - - - - SLEGKFAIITGGSRGIGEAI AHNL
An-XhrA      1  M- - - - - SLKGVAVITGGARGIGAGIVRSL
Tr-LXR4      1  MAR- - - - - PYEGKLAIVTGASRGIGAAVARRL
Tr-LXR3      1  MTQMKN GAFPHD NAAVPN VERVLP LF SLKGR TAI VSGAGAGIGLAV AQAF

An-LxrA      28  ASKGC SLLLN YTS DSS RTRTES LCN TLST THKIT CIPV QADLS DPAPAVN
An-XhrA      26  SEQGA KVAFN YVSS SRKA ADALIE SLRQN - NNEATA VQADIT DPN-APK
Tr-LXR4      28  AAKGS NVLIT FTS DSS RDLTR GLVEEL SSKHG VHVQS VOTDLAKASTAAP
Tr-LXR3      51  AEAGANVAIWYNSNKQA - -VT- SAEDI AKTYGVKCKAYQVNV TSAE- AVD

An-LxrA      78  TIISA AKTHFTS PT- - - - - TNTLT IDILI NNAGVSKDR- FLNDPSS GPIDP
An-XhrA      74  MIIQA ALEAF QT- - - - - DRIDIL VNNAGAGDNR- PLEEV - - - TMDS
Tr-LXR4      78  IIVEA ARTL FDS YSP PS GGKKFOVD ILI NNAGVSSNQ- FLNDPEK GAIDE
Tr-LXR3      97  KAIT EIIKEFN - - - - - GRLDV FVANS GITWTEGAFID- - - GSVES

An-LxrA      123  AYFNW HYTIN VLA P LLLTQACAEYL PRKPA - - - - - HSGRIIN
An-XhrA      111  - - YMLMD VNVRA VIFMTQAIL PYIP - - - - - RGGRIIN
Tr-LXR4      127  AEFTR VYAIN VLA P LLLTQAVAPHL PAD - - - - - RSGRIIN
Tr-LXR3      134  - - ARNVMS VNV DGV M WCAKSAGAHFR RQKEEGTTIDGKPLDNFIAGSFIA

An-LxrA      160  ISSISS SLGF - - TGQSVY GGT KAAL EAMTRTWARELADV - - ATVNAVNP G
An-XhrA      142  LSSISS RGGY - - ATQSVYAASKAAVEGLTRVWATELGHKYGVTVNANP G
Tr-LXR4      162  VSSVSA SIGY - - LGQSVYAGSKGAL EVMTRTWARELAER - - ATVNSVNP G
Tr-LXR3      182  TASM SGI VNV PQLQAVYNS SKAAV IHFCKSLAVEWTGF - - ARVNTVSPG

An-LxrA      206  PVVGD MYFATG EEFWKQMQGFQDNT PLSKLVDGEEAVEELL - - SEEQKR
An-XhrA      190  PVDTD MYQAAGEV H LKRMEEQNK - - - - - 
Tr-LXR4      208  PAWGD MYAEAGPT FWRRNQPYVDAA PLMA - YDGEEDV LRRAGGEADK FDR
Tr-LXR3      230  YIITE ISNFVPP - - - - - ETKT

An-LxrA      253  LIREK MGRRP AFTREIAGVVGMLCTEDGAWCTGSVVCANGGLK - - FT
An-XhrA      213  - - - KVPAG QRCGT VODIGDIVSFLAEERSRWVTGDVI CANGGML - - YI
Tr-LXR4      257  LVREQ MGRRP GF ADEIAGTV DMLCTEE SCWTTGSVVCANGGM RMSIA
Tr-LXR3      246  LWKDK IVMGR EGRV GELK GAYLYL ASDASSY TTGLDMIVDGGYS - - LP
```

Legend figure S1:

Protein sequence alignment of LxrA, XhrA, LXR4, and LXR3. In *Aspergillus niger*, two close homologues, LxrA and XhrA, function in distinct catabolic pathways for L-arabinose and for D-galactose, respectively. In *Trichoderma reesei* (*Hypocrea jecorina*), the close homologue of these two proteins, LXR4, is responsible for L-xylo-3-hexulose conversion to D-sorbitol in the oxido-reductive D-galactose pathway; while the more distant homologue, LXR3, carries out the L-xylulose reduction in the L-arabinose catabolic pathway.

### Supplementary figure 2:

The Vista track (comparative analysis) of the *xhrA* and *galX* in selected *Aspergilli*

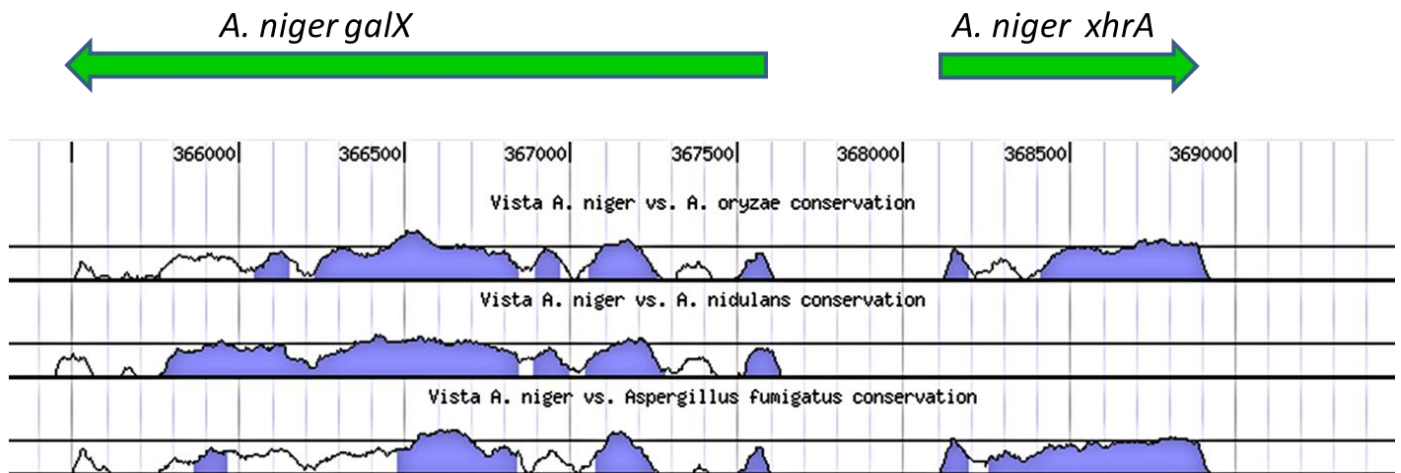

Legend figure S2:

Comparison of the genomic regions covering the *galX* and *xhrA* genes in three *Aspergillus* species with *A. niger*. While all of the species contain the *galX* gene, only *A. oryzae* and *A. fumigatus*, but not *A. nidulans*, seem to have the *xhrA* gene (the figure is a modification of a vista visualization obtained from the JGI *Aspergillus niger* v3.0 web database - <http://genome.jgi-psf.org/Aspni5/>).

Supplementary figure 3:

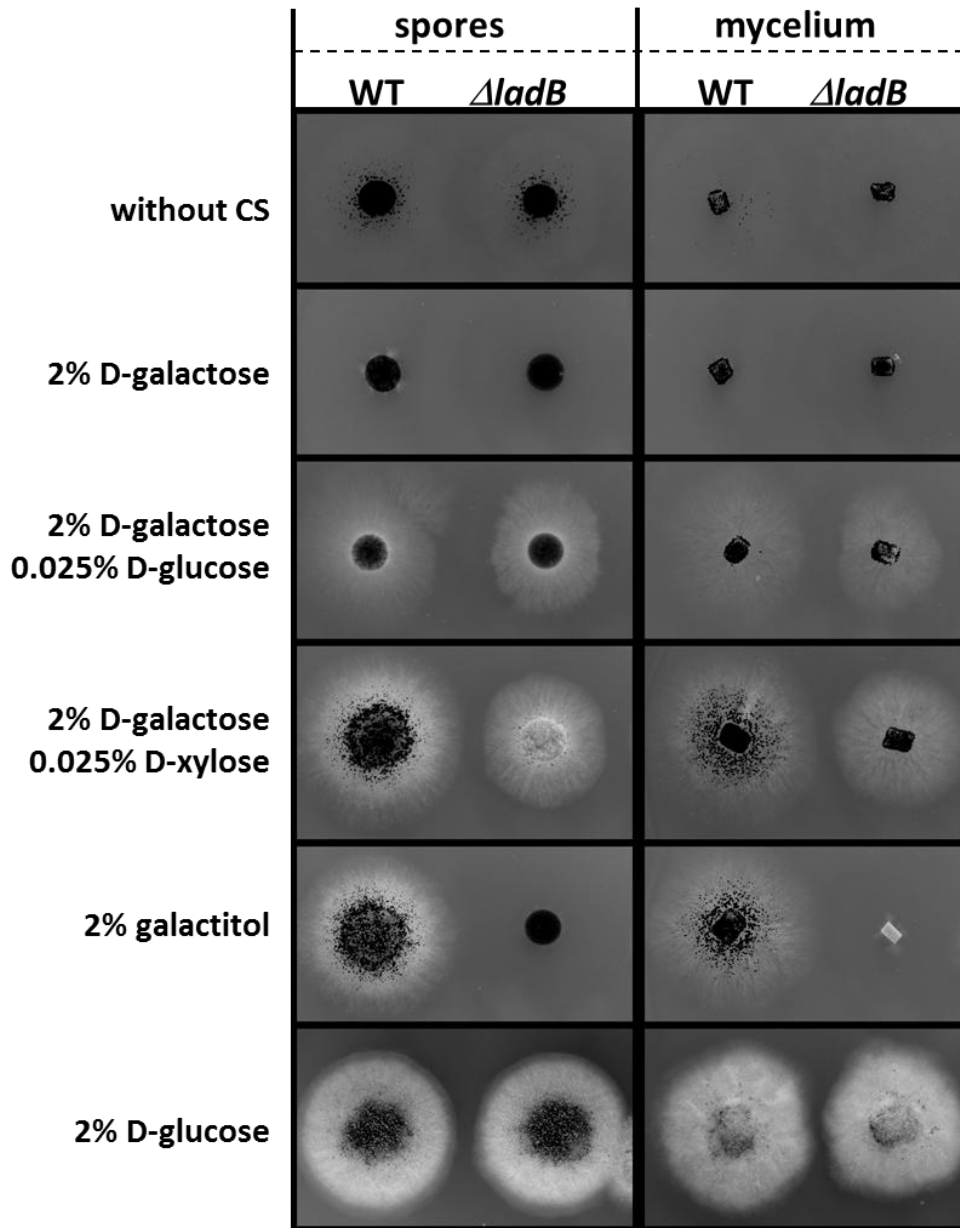

Legend figure S3:

Growth of the *A. niger* strain ATCC 1015 (WT) and the ATCC 1015 with a deletion in *ladB* ( $\Delta ladB$ ) on different carbon sources (CS). Comparison of the growth originated from either conidiospores (left panel) or pre-grown mycelium (right panel). The conidiospores were collected from cultures grown on PDA (potato-dextrose agar) plates and kept at  $-80^{\circ}\text{C}$ . The mycelia were produced by inoculating the spores into YESG (2% yeast extract; 4% sucrose; 3% gelatin) medium and cultivating at  $28^{\circ}\text{C}$  for 18 hours. The mycelium was collected by filtration, washed with sterile water, and cut into identical pieces

prior to the inoculation on the agar plates. The test plates contained YNB (yeast nitrogen base), 2% agar, and a carbon source as indicated in the figure. The cultivation was carried out at 28°C for 4 days in the case of spore-inoculation or 3 days in the case of mycelium-inoculation.

Here we summarise the observations supporting our claims:

- The mycelium pre-grown in the presence of sucrose and peptides is not able to grow after transfer to D-galactose.
- The addition of a small amount of D-xylose into the D-galactose-containing medium leads to considerable enhancement of growth of the wild type stain regardless of the form of inoculum. This is caused by induction of XyrA-dependent D-galactose reductase activity and not by the induction of the Leloir pathway (1).
- On the other hand, addition of a small amount D-glucose into the D-galactose-containing medium leads to only minimal growth probably caused by the D-glucose itself rather than by D-galactose. This is expected as the genes encoding the D-galactose oxido-reductive metabolism are repressed (Fig. 2, (1)). However, Fekete et al. showed that in their *A. niger* strain the genes encoding the Leloir pathway are expressed even in presence of D-glucose (2).
- The *A. niger* strain we used seemed to have no difficulty to sporulate in the presence of D-galactose when supplemented by a small amount of D-xylose (Fig. S3).

1. Mojzita, D., Koivistoinen, O. M., Maaheimo, H., Penttilä, M., Ruohonen, L., and Richard, P. (2012) *Fungal Genet. Biol.* **49**, 152-159
2. Fekete, E., de Vries, R. P., Seiboth, B., Vankuyk, P. A., Sándor, E., Fekete, E., Metz, B., Kubicek, C. P., and Karaffa, L. (2012) *FEMS Microbiol Lett.* **329**, 198-203
